# Supplementary material
Source: publisher site journal article supplement (https://www.dovepress.com/article/404310)
Supplement: Supplementary file 1 [file get_supplementary_file.php]

Supplements

1. Motivation scale for Infection-prevention behaviors

| Item | Statement | Factor Loading | | | | Item-Total correlation |
| --- | --- | --- | --- | --- | --- | --- |
| Barrier | Efficacy | Threat | Benefits |
| se1 | I am confident in wearing a mask properly all the time |  | .765 |  |  | .369 |
| se2 | I am confident in avoiding places where people gather and keeping a good distance |  | .752 |  |  | .381 |
| se3 | I am confident in hand sanitizing and hand washing |  | .751 |  |  | .379 |
| se4 | I am confident in creating a healthy environment through frequent disinfection and ventilation |  | .757 |  |  | .452 |
| se5 | I am confident in overcoming the current COVID-19 crisis without feeling anxious or stressed |  | .555 |  |  | .383 |
| se6 | I I am confident in finding COVID-19 information and complying with quarantine guideline |  | .687 |  |  | .445 |
| bar7 | Following quarantine guidelines is tiring | .768 |  |  |  | .414 |
| bar8 | It is difficult to find information on infection-prevention behaviors | .837 |  |  |  | .490 |
| bar9 | It is difficult to follow the quarantine guidelines when hanging out with friends | .805 |  |  |  | .445 |
| bar10 | Paying attention to the quarantine guidelines makes me feel more anxious | .820 |  |  |  | .490 |
| bar11 | The quarantine guidelines are complicated and hard to follow | .886 |  |  |  | .449 |
| bar12 | I believe the required quarantine guidelines are too much compared to the situation | .861 |  |  |  | .421 |
| ben13 | Following infection-prevention behaviors in right way can prevent from getting COVID-19 |  |  |  | .477 | .445 |
| ben14 | I am following the quarantine guidelines for the health of my family and myself |  |  |  | .575 | .410 |
| ben15 | Following the quarantine guidelines can help us to maintain our daily activities |  |  |  | .639 | .417 |
| ben16 | Vaccination reduces the risk of infection and weakens the ability to transmit |  |  |  | .771 | .435 |
| ben17 | Following the quarantine guidelines will help keep our society function normally |  |  |  | .658 | .422 |
| ben18 | Even with some side effects after vaccination, I believe it is safer than getting COVID-19 |  |  |  | .816 | .393 |
| p19 | I am afraid of getting infected with COVID-19 |  |  | .687 |  | .467 |
| p20 | I am worried that the pandemic crisis will continue and deteriorate our economy |  |  | .645 |  | .424 |
| p21 | Getting Covid-19 can be risky for life |  |  | .745 |  | .516 |
| p22 | COVID-19 can continue to have after-effects even with treatment |  |  | .749 |  | .529 |
| p23 | I am afraid that if I become infected, I will harm my family and people around me |  |  | .690 |  | .442 |
| p24 | Even if the COVID-19 crisis is over, it seems that the situation will not be able to go back to the way it was |  |  | .479 |  | .485 |

Variance accounted for = 70.6%

Cronbach’s alpha = .87 (total), .85 (self-efficacy), .91 (barriers), .80 (benefits), .80 (threats)

1. Social Support Scale

| Item | Statement | Factor loading | Item-Total correlation |
| --- | --- | --- | --- |
| SS1 | I can find someone to talk to when I have fear about getting infected | .826 | .413 |
| SS2 | I can find someone who could help me with infection-prevention behaviors | .829 | .447 |
| SS3 | There is someone I can call whenever I want to talk | .828 | .471 |
| SS4 | There is someone I can turn to for advice about handling problems | .882 | .425 |

Variance accounted for = 70.8%

Cronbach’s alpha = .86

1. Infection-prevention Behaviors Scale

| Item | Statement | Factor loading | Item-Total correlation |
| --- | --- | --- | --- |
| pb1 | Always wear a mask indoors and in crowded places | .485 | .413 |
| pb2 | When disposing of a mask after use, avoid touching its outer side | .536 | .447 |
| pb3 | Wearing a mask close to the face by covering the mouth and nose | .574 | .471 |
| pb4 | If you experience difficulty breathing or a headache, go outside to take a break, and put it back on | .437 | .425 |
| pb5 | Refrain from talking while eating by taking off your mask | .691 | .581 |
| pb6 | Use individual plates and avoid sharing food from the same bowl | .627 | .495 |
| pb7 | Keep a distance of at least 2 meters from other people | .673 | .547 |
| pb8 | Avoid gatherings in confined or crowded places | .639 | .499 |
| pb9 | Avoid physical contact and shaking hands when meeting people | .647 | .524 |
| pb10 | When you have symptoms, stay home and avoid contact with others | .607 | .462 |
| pb11 | When you have symptoms (fever, cough, or sore throat), call 1339 or the local health center. | .561 | .458 |
| pb12 | Cough into your upper sleeve, not your hands | .679 | .547 |
| pb13 | When you come back home from outside, be sure to wash your hands | .600 | .476 |
| pb14 | Wash your hands for at least 30 seconds | .627 | .487 |
| pb15 | Open windows and ventilate at least twice I the morning and afternoon | .621 | .527 |
| pb16 | Open windows for ventilation before, during, and after cleaning and disinfection | .616 | .510 |
| pb17 | Disinfect daily hand-touched surfaces and objects in everyday spaces | .528 | .514 |
| pb18 | Although not able to see each other, keep in touch with family and close people | .561 | .532 |
| pb19 | Do not discriminate COVID-19 patients or quarantined people | .456 | .402 |
| pb20 | Be considerate of the vulnerable and those in need | .530 | .492 |
| pb21 | Do not share un-grounded information or rumors | .580 | .491 |
| pb22 | Maintain routines such as sleep, eating, rest, and exercise | .605 | .532 |
| pb23 | Eat a well-balanced diet and drink plenty of water | .641 | .572 |
| pb24 | Be aware of social distancing guidelines issued by local governments | .658 | .540 |
| pb25 | Strictly follow social distancing guidelines | .662 | .546 |

Variance accounted for = 35.7%

Cronbach’s alpha = .92
